# Supplementary material for: Genome Modeling System: A Knowledge Management Platform for Genomics
Source: PubMed Central journal article supplement (PMC4497734; doi:10.1371/journal.pcbi.1004274), 2015-07-09
Supplement: pcbi.1004274.s002.pdf [file pcbi.1004274.s002.pdf]

## A. The 'genome model tools' (gmt) command

```
ssmith@blade13-4-4: ~ — ssh — 118x53
ssmith@blade13-4-4: ~
Sub-commands for gmt:
smalt          Tools to run smalt or work with its output files.
tophat        Tools to run Tophat or work with its output files.
ssaha2        Tools to run SSAHA2 or work with its output files.
bfast         Tools to run Bfast or work with its output files.
tigra-sv      Tools to run tigra_sv or work with its output files.
blat          Tools to run Blat or work with its output files.
bwa           Tools to run BWA or work with its output files.
crossmatch    Tools to run Crossmatch or work with its output files.
picard        Tools to run the Java toolkit Picard and work with SAM/BAM
              format files.
novocraft     Tools to run novocraft or work with its output files.
bmap         Tools to run BSMAP or work with its output files.
mosaik        Tools to run Mosaik or work with its output files.
```

## B. Each top-level command provides access to a list of tools, or further sub-trees

```
bowtie        tools to work with the Bowtie aligner
breakdancer   discovers structural variation using breakdancer
bwa-sw        tools to work with Ssaha output
chimera-slayer Tool to run chimera detector: chimera_slayer
complete-genomics ... base class for commands which delegate to sub-commands
copy-cat      ... the CopyCat copy number analysis tools
cufflinks     Tools to run Cufflinks or work with its output files.
detect-variants A selection of variant detectors.
dgidb         ... Toolkit for DGIDB related process
ensembl       ... Tools to work with the local Ensembl API.
epitope-prediction ... Different pipeline steps for Immune Epitope Prediction for
far           ... To trim adaptor sequences
fasta         Tools for working with FASTA and Qual files
fastq         tools for working with FASTQ files
fastqc        Tools to run the Java toolkit FastQC and work with the
              output reports.
fastx         Tools to run Fastx or work with its output files.
galaxy        ... the Galaxy web interface
gatk          tools to work with Gatk output
gene-torrent  no description!!!: define 'doc' in the class definition for
              Genome::Model::Tools::GeneTorrent
gtf           ... Tools to work with gtf format annotation files.
htseq         ... htseq tools (htseq-count and htseq-qa) work with
              gene/transcript hit-counts
lift-over     wrapper for the UCSC liftOver tool with support for
              additional input formats, maintaining additional columns
```

### C. The 'gmt fasta' sub-tree contains script-like components for working with FASTA files

```
ssmith@blade12-1-1 > gmt fasta
Sub-commands for genome tools fasta:
apply-diff      --diff=? --input=... applies seq inserts and deletes from a diff file to a fasta
                file
chunk          --chunk-size=? --... Divide fasta into chunk by chunk_size
concat         --input-files=?[,... Mixin that gives commands color option
deduplicator   --fasta-file=? [-... remove duplicates from a file of reads
diff           [--debug] FILE1 F... use KDiff3 to show differences between fasta data files
dust           --dusted-file=? -... Tools for working with FASTA and Qual files
filter-ids     [--verbose] [--wh... filter sequences from a fasta file based on patterns
                applied to the IDs
orient         --fasta-file=? [-... Orients FASTA (and Quality) files by blastn given sense and
                anti-sense sequences
remove-n       --fasta-file=? [-... remove reads from file containing N
sanitize       --fasta-file=? [-... Cleans FASTA (and Quality) files
screen-vector  --fasta-file=? [-... (Fnq = Fasta And Quality) screen for vector
sliding-windows --fasta-file=? --... Tools for working with FASTA and Qual files
sort-by-name   --input-fasta=? [... Sorts a fasta by sequence name
```

### D. Each tool has auto-generated help

```
ssmith@linus43: ~ — ssh — 100x40
ssmith@linus43: ~
ssmith@linus43 ~$ gmt fasta filter-ids -h
USAGE
gmt fasta filter-ids [--verbose] [--whitelist-regex=?] [--blacklist-regex=?]
INPUT-FILENAME OUTPUT-FILENAME

SYNOPSIS
gmt fasta filter-ids in.fa out.fa --whitelist '^(d+|X,Y)$' --blacklist '6'

REQUIRED INPUTS
INPUT-FILENAME
the input file
OUTPUT-FILENAME
the path to the file that will be created

OPTIONAL INPUTS
whitelist-regex
include only IDs that match this pattern
blacklist-regex
exclude any IDs that match this pattern

OPTIONAL PARAMS
verbose
more messages

DESCRIPTION
This tool filters a FASTA sequence file, removing entries based on the ID in the FASTA header.
If the "whitelist regex" (-w) option is supplied, only IDs that match this regular expression
will be included. If the "blacklist regex" (-b) option is supplied, only IDs that do NOT match
this regular expression will be included.

NOTE

If an ID matches both the black list and the white list, it is skipped.

ssmith@linus43 ~$
```

E. The code for a GMT tool can be as simple as a short script

```
1 package Genome::Model::Tools::Fasta::FilterIds;
2 use strict;
3 use warnings;
4 use Genome;
5 use Bio::SeqIO;
6
7 class Genome::Model::Tools::Fasta::FilterIds {
8     is => 'Command::V2',
9     has_input => [
10         input_filename => {
11             is => 'FilesystemPath', shell_args_position => 1,
12             doc => 'the input file',
13         },
14         output_filename => {
15             is => 'FilesystemPath', shell_args_position => 2,
16             doc => 'the path to the file that will be created',
17         },
18         whitelist_regex => {
19             is => 'Text', is_optional => 1,
20             doc => 'include only IDs that match this pattern',
21         },
22         blacklist_regex => {
23             is => 'Text', is_optional => 1,
24             doc => 'exclude any IDs that match this pattern',
25         },
26     ],
27     has_param => [
28         verbose => {
29             is => 'Boolean', is_optional => 1,
30             doc => 'more messages'
31         },
32     ],
33     doc => "filter sequences from a fasta file based on patterns applied to the IDs",
34 };
35
36 sub execute {
37     my $self = shift;
38     my $input_filename = $self->input_filename;
39     my $output_filename = $self->output_filename;
40     my $verbose = $self->verbose;
41
42     my $blacklist_regex = $self->blacklist_regex;
43     my $whitelist_regex = $self->whitelist_regex;
44
45     my $reader = Bio::SeqIO->new( '-file' => '< '.$input_filename, '-format' => 'fasta');
46     my $writer = Bio::SeqIO->new( '-file' => '> '.$output_filename, '-format' => 'fasta');
47
48     while (my $seq = $reader->next_seq) {
49         my $id = $seq->id;
50         if ($blacklist_regex and $id =~ $blacklist_regex) {
51             $self->status_message("skipping $id because it matches the blacklist pattern");
52             next;
53         }
54         elsif ($whitelist_regex and not $id =~ $whitelist_regex) {
55             $self->status_message("skipping $id because it does not match the whitelist pattern");
56             next;
57         }
58         elsif ($verbose) {
59             $self->status_message("keeping $id");
60         }
61         $writer->write_seq($seq);
62     }
63     return 1;
64 }
65
```

F. Additional code can be added to the module to explicitly or dynamically generate other documentation

```
65
66 sub help_synopsis {
67 return <<'EOS'
68     gmt fasta filter-ids in.fa out.fa --whitelist '^(\d+|X,Y)$' --blacklist '6'
69 EOS
70 }
71
72 sub help_detail {
73     return <<EOS
74 This tool filters a FASTA sequence file, removing entries based on the ID in the FASTA header.
75 If the "whitelist regex" (-w) option is supplied, only IDs that match this regular expression will be included.
76 If the "blacklist regex" (-b) option is supplied, only IDs that do NOT match this regular expression will be included.
77 EOS
78 }
79
80 sub _additional_help_sections {
81     return (
82         "NOTE" =>
83         "If an ID matches both the black list and the white list, it is skipped."
84     );
85 }
86
87 sub _doc_manual_body {
88     # expect to return POD
89     my $help = shift->help_detail;
90     $help =~ s/\n+$/\n/g;
91     return $help;
92 }
93
94 sub _doc_authors {
95     return <<EOS
96     Scott Smith
97     Edward Belter
98 EOS
99 }
100
101 sub _doc_copyright_years { (2013) }
102
103 sub _doc_license {
104     my $self = shift;
105     my (@y) = $self->_doc_copyright_years;
106     my $range;
107     if (@y == 1) { $range = "$y[0]"; }
108     elsif (@y > 1) { $range = "$y[0]-$y[-1]"; }
109     return <<EOS
110 Copyright (C) $range Washington University in St. Louis.
111
112 It is released under the Lesser GNU Public License (LGPL) version 3. See the
113 associated LICENSE file in this distribution.
114 EOS
115 }
116
117 sub _doc_credits {
118     return ('','This software was created with funding from the National Human Genome Research Institute.');
```
