# Supplementary material for: Genome Modeling System: A Knowledge Management Platform for Genomics
Source: PubMed Central journal article supplement (PMC4497734; doi:10.1371/journal.pcbi.1004274), 2015-07-09

## A. Genome-wide tumor-normal copy number differences

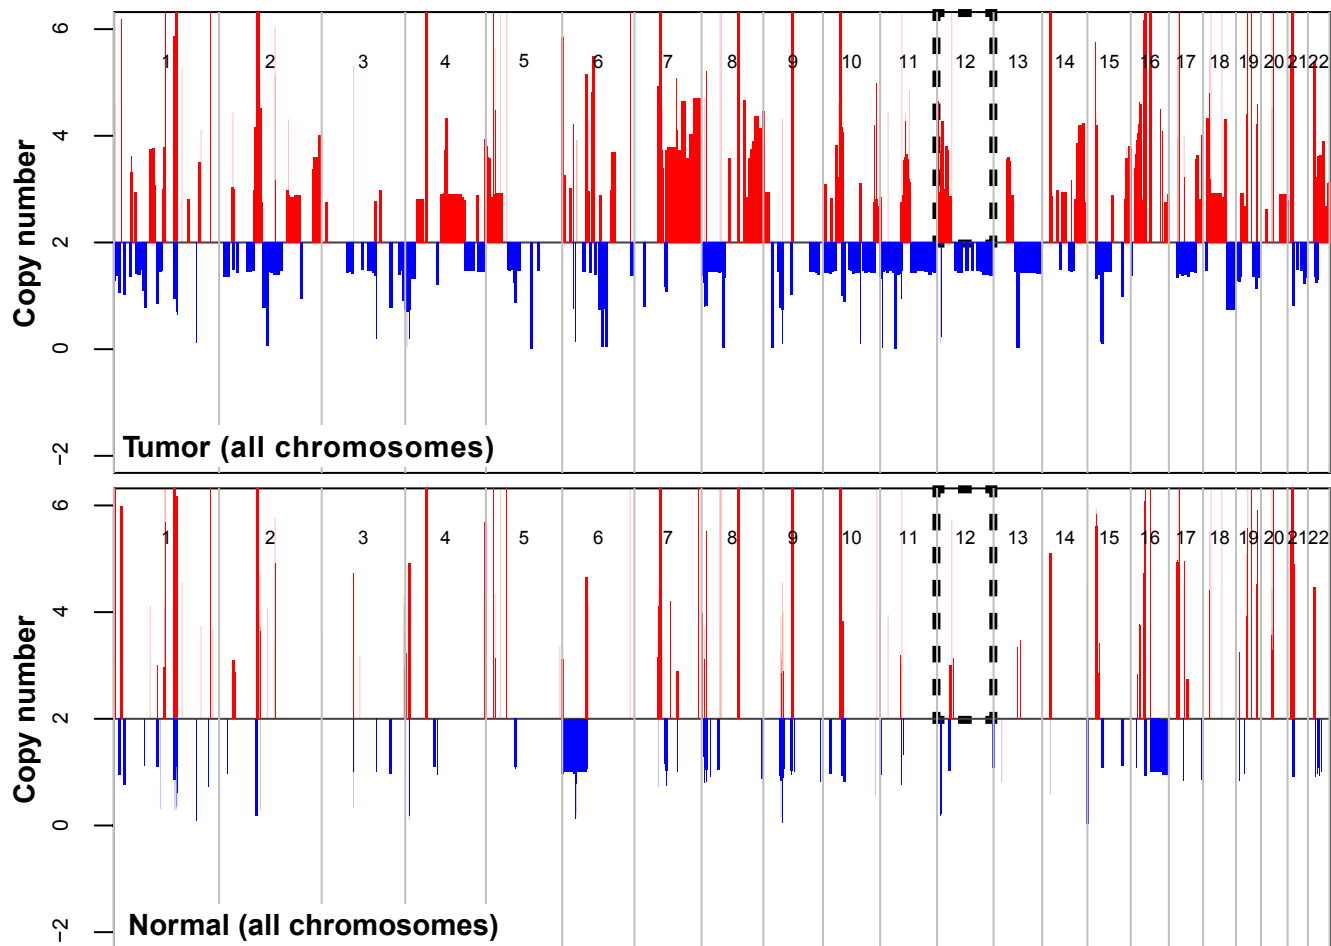

## B. Chromosome 12 tumor-normal copy number differences

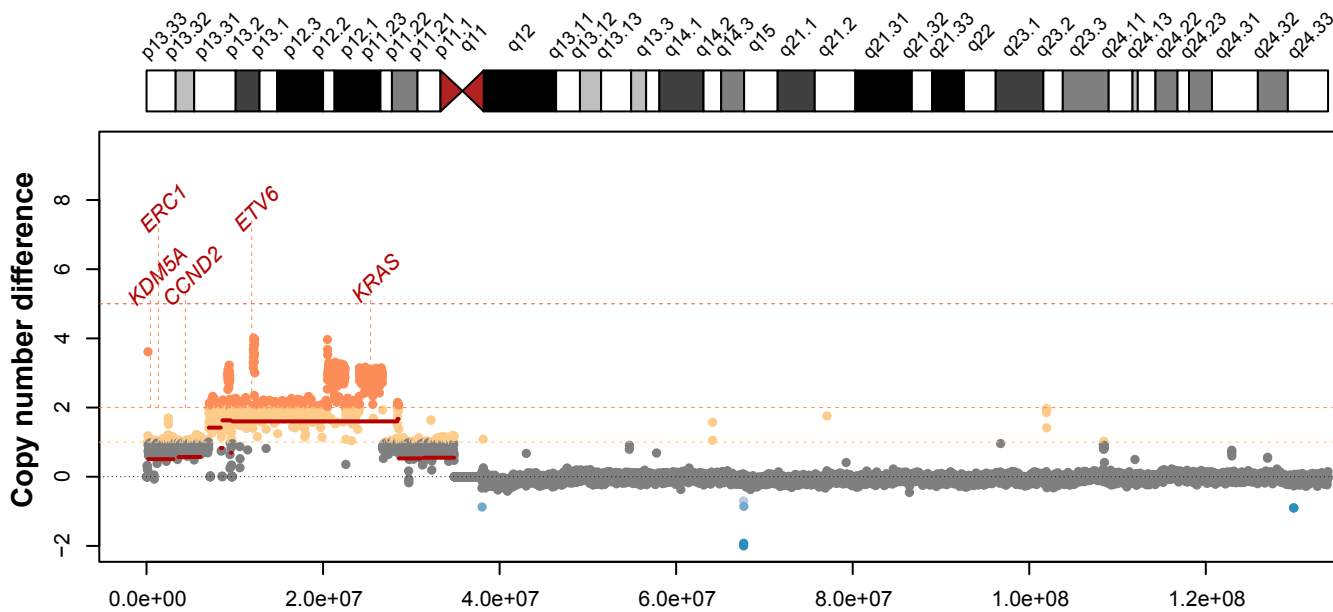

Supplement: pcbi.1004274.s003.pdf [file pcbi.1004274.s003.pdf]
