# Supplementary material for: Genome Modeling System: A Knowledge Management Platform for Genomics
Source: PubMed Central journal article supplement (PMC4497734; doi:10.1371/journal.pcbi.1004274), 2015-07-09

# A. HCC1395 mutations previously observed in cancer according to Cosmic

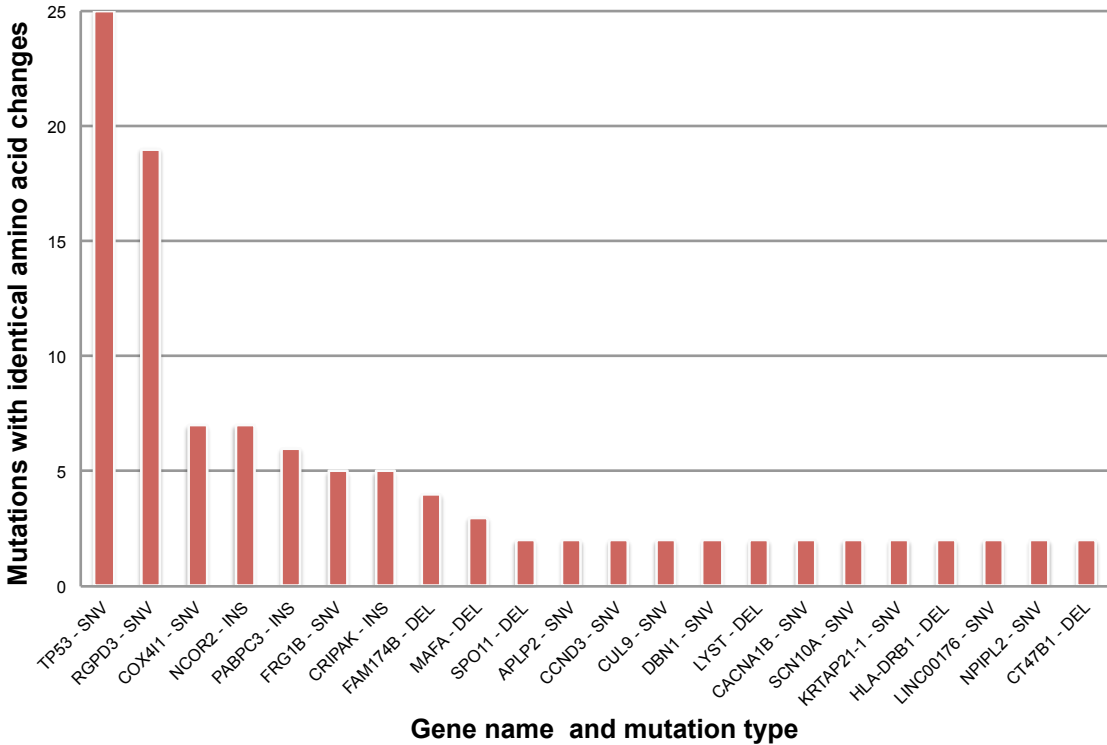

# B. HCC1395 mutated genes grouped by cancer annotations

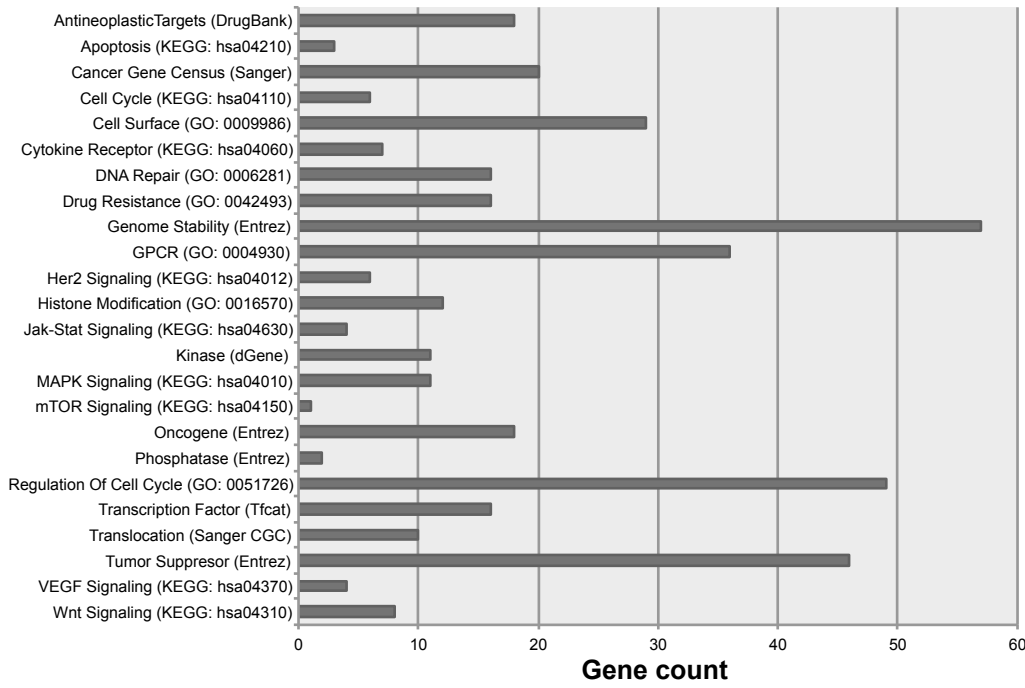

Supplement: pcbi.1004274.s005.pdf [file pcbi.1004274.s005.pdf]
