# Supplementary material for: Genome Modeling System: A Knowledge Management Platform for Genomics
Source: PubMed Central journal article supplement (PMC4497734; doi:10.1371/journal.pcbi.1004274), 2015-07-09

## A. Automated IGV session creation facilitates manual review of Indels

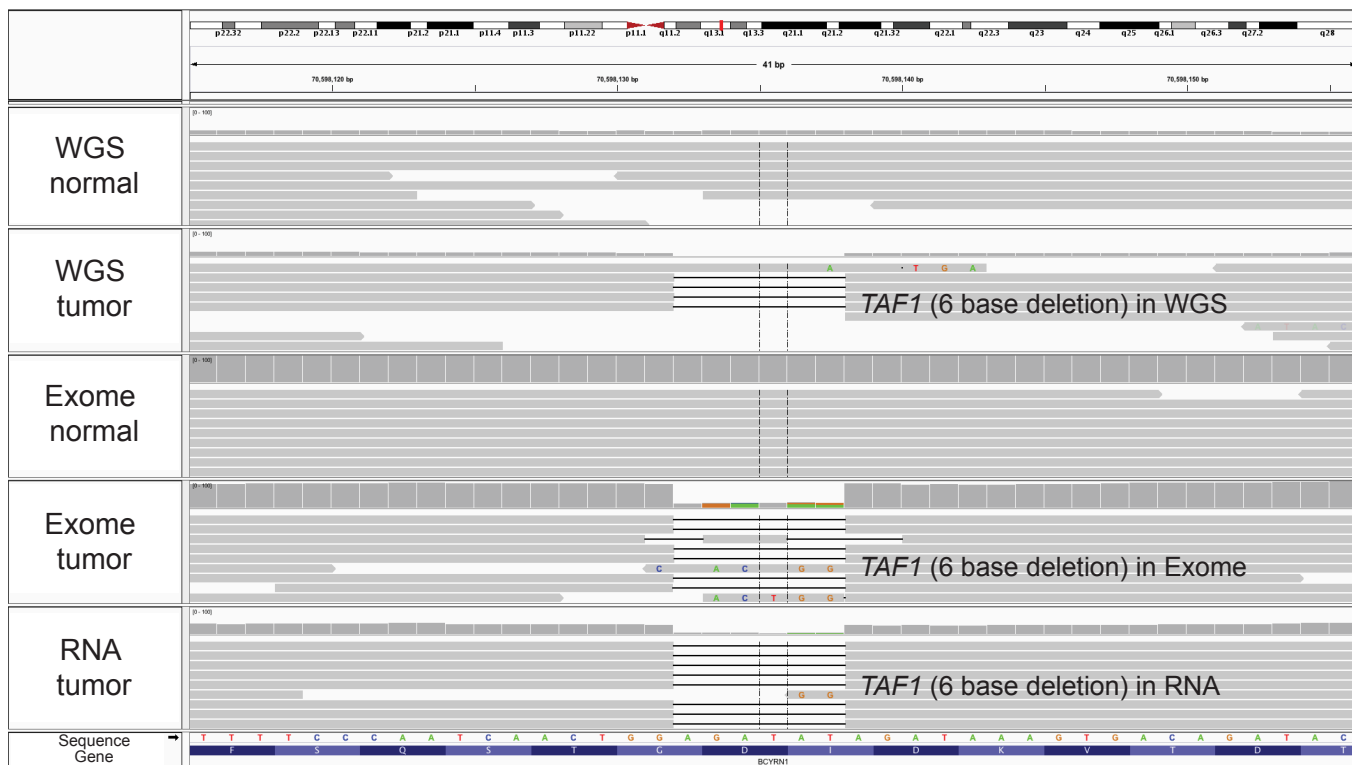

## B. *TAF1* mutations. Amino acid and protein domain context

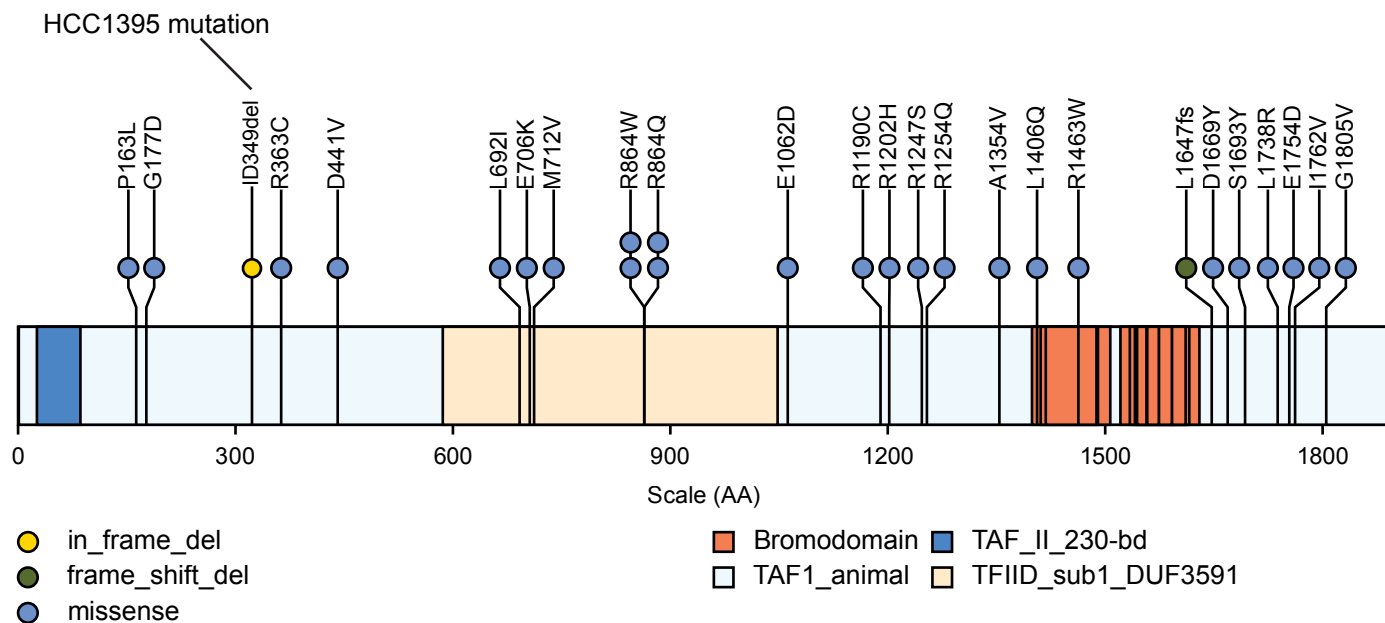

Supplement: pcbi.1004274.s007.pdf [file pcbi.1004274.s007.pdf]
