# Supplementary material for: Genome Modeling System: A Knowledge Management Platform for Genomics
Source: PubMed Central journal article supplement (PMC4497734; doi:10.1371/journal.pcbi.1004274), 2015-07-09

## A. Normal sample read coverage (WGS & exome)

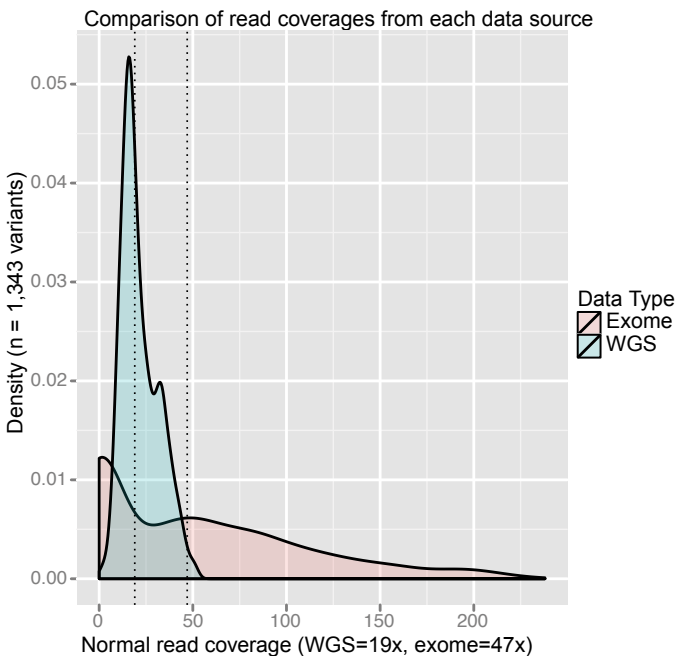

## B. Tumor WGS coverage over variant positions

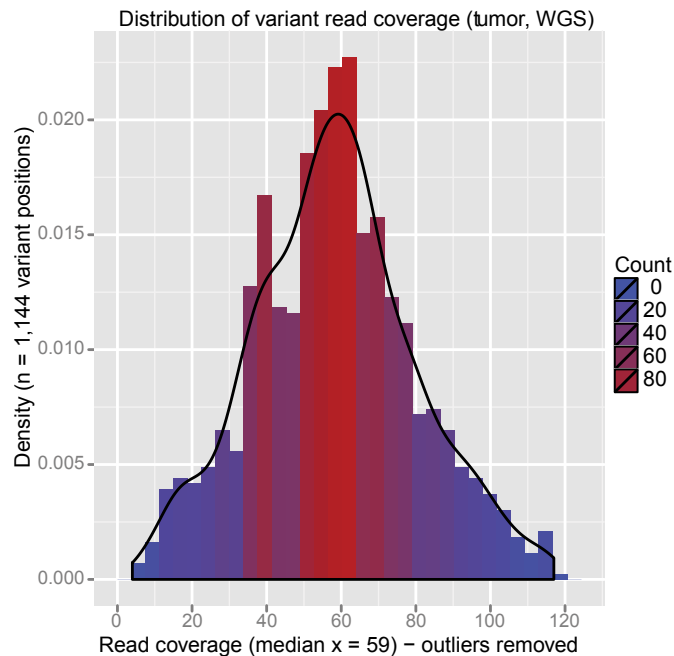

## C. Tumor variant allele frequency (WGS vs. exome)

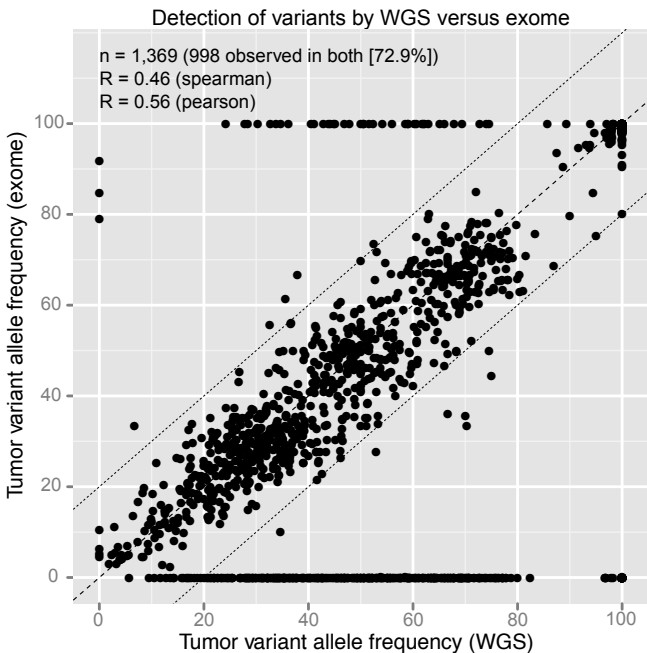

## D. Tumor variant allele frequency (exome vs. RNA)

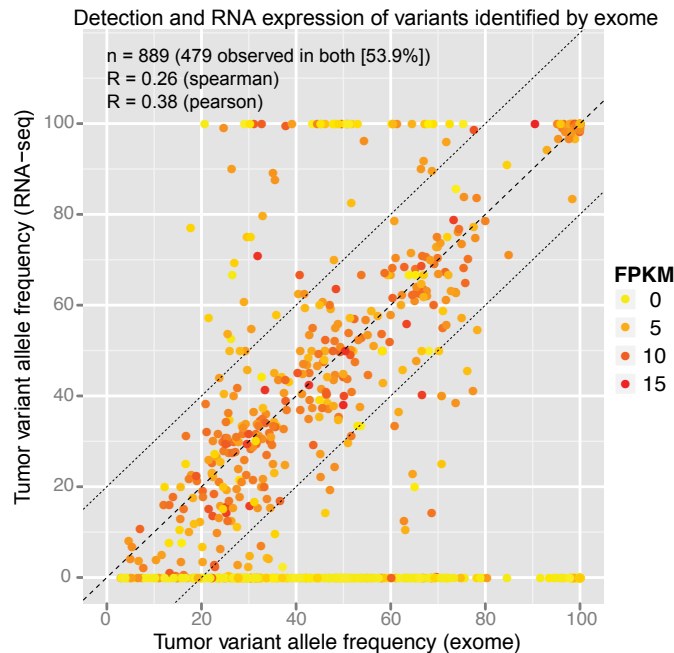

Supplement: pcbi.1004274.s008.pdf [file pcbi.1004274.s008.pdf]
