# Supplementary material for: Genome Modeling System: A Knowledge Management Platform for Genomics
Source: PubMed Central journal article supplement (PMC4497734; doi:10.1371/journal.pcbi.1004274), 2015-07-09

# A. Genes with supporting read-pair support for somatic HCC1395 gene fusions

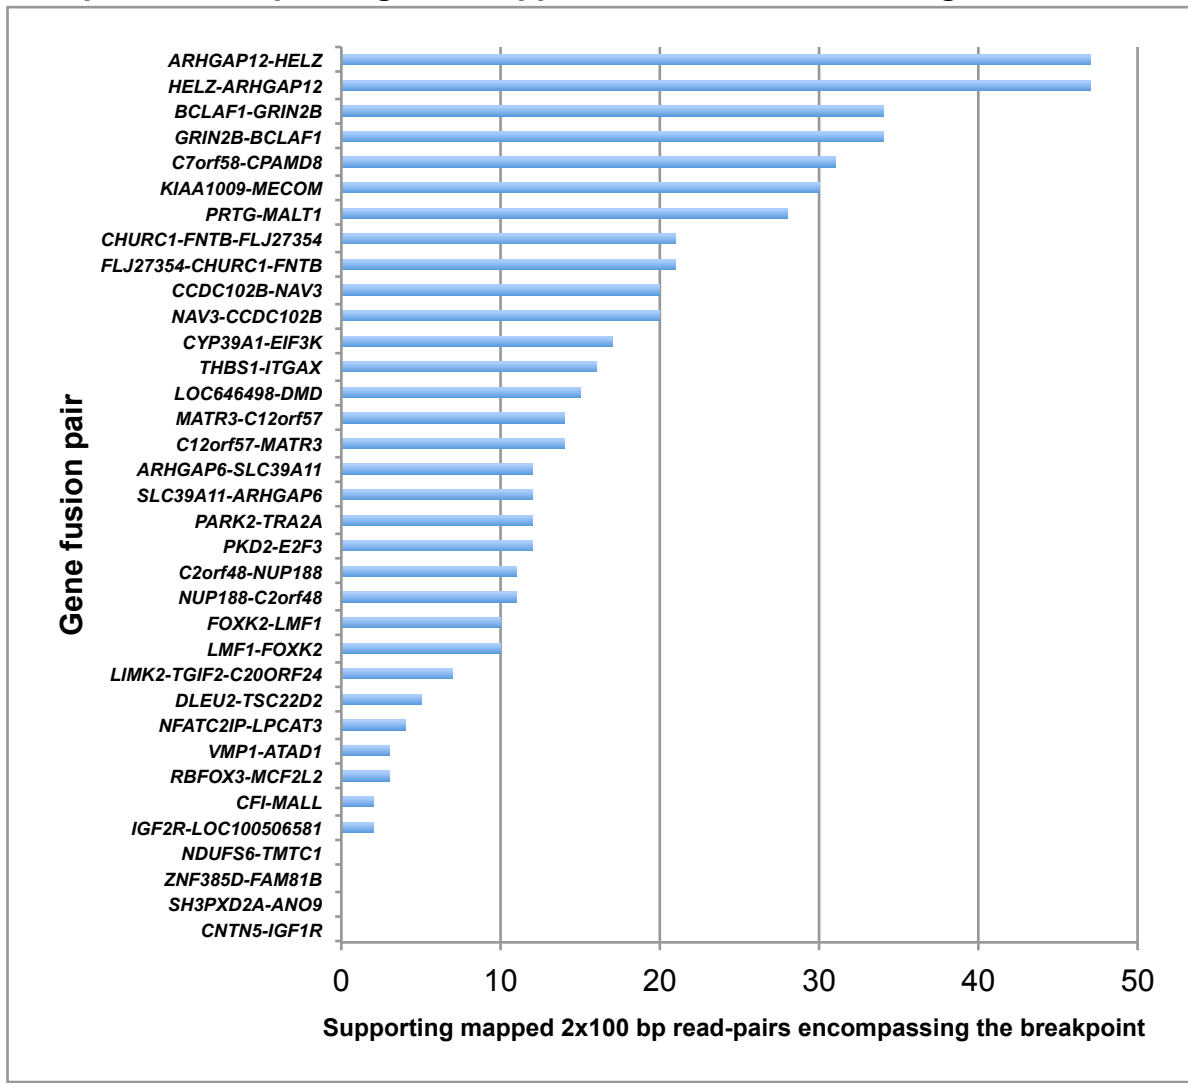

# B. Coverage and breakpoint encompassing read support for: PRTG-MALT1 fusion

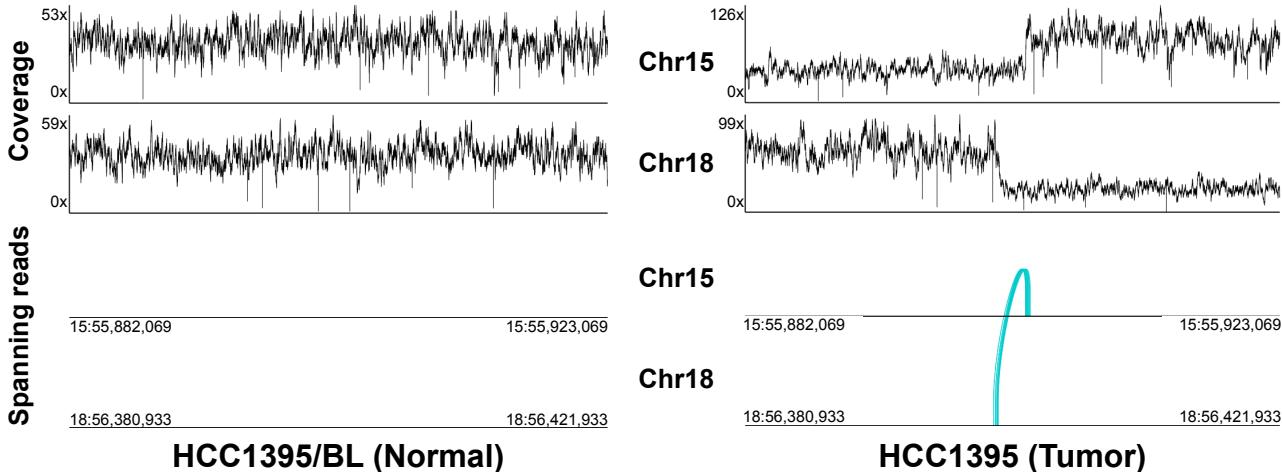

Supplement: pcbi.1004274.s009.pdf [file pcbi.1004274.s009.pdf]
