# Supplementary material for: Genome Modeling System: A Knowledge Management Platform for Genomics
Source: PubMed Central journal article supplement (PMC4497734; doi:10.1371/journal.pcbi.1004274), 2015-07-09

### A. Insert size histogram

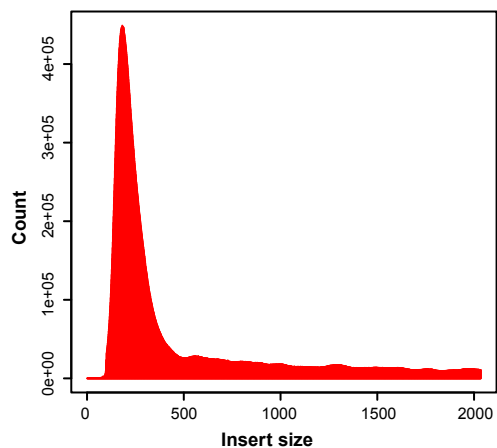

### B. Coverage versus transcript position

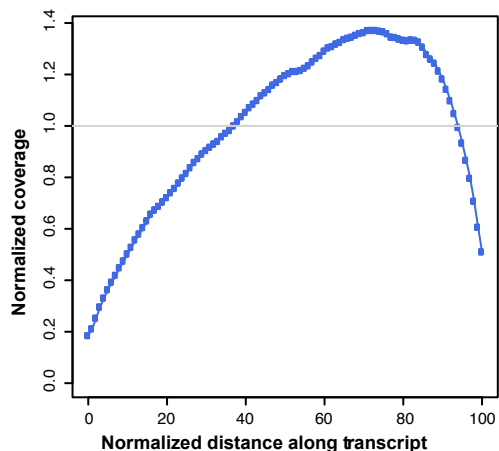

### C. Transcriptome components of mapped reads

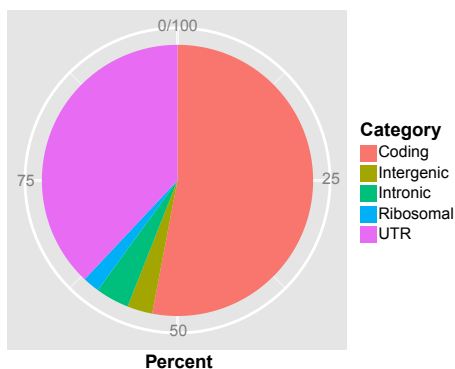

### D. Breadth and depth of exon junction coverage

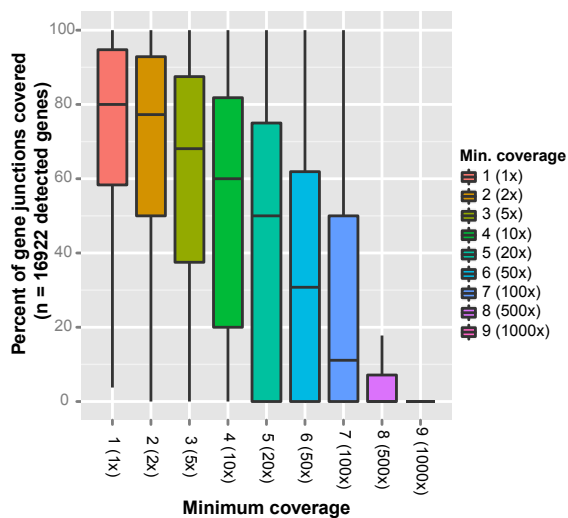

### E. Observed pattern of splice site usage

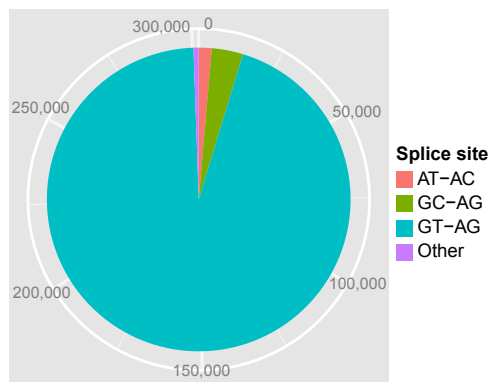

### F. Expression of *NPM1* compared to all genes

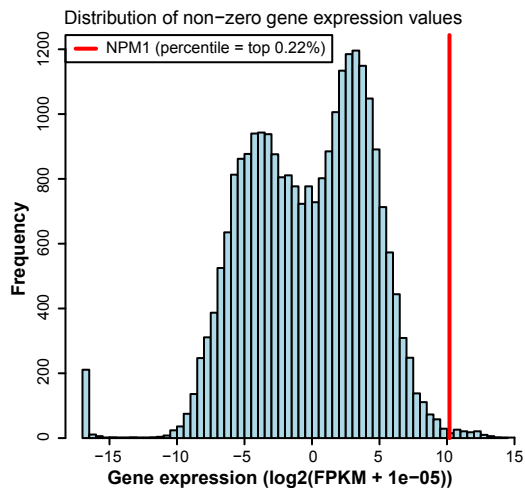

Supplement: pcbi.1004274.s011.pdf [file pcbi.1004274.s011.pdf]
