# Supplementary material for: Genome Modeling System: A Knowledge Management Platform for Genomics
Source: PubMed Central journal article supplement (PMC4497734; doi:10.1371/journal.pcbi.1004274), 2015-07-09
Supplement: pcbi.1004274.s013.pdf [file pcbi.1004274.s013.pdf]

## A. GMS build report header

```
ssmith@blade14-2-16 ~> genome model build view id=135798051
'build' may require verification...
Resolving parameter 'build' from command argument 'id=135798051'... found 1
=== Build ===
Build ID: 135798051          Build Status: Succeeded
Model ID: 2891454547       Model Name: H_NJ-HCC1395-HCC1395.somatic_variation-1
Run by: mgriffit           Processing Profile ID: 2762562
Build Scheduled: 2013-03-18 14:52:49   Build Completed: 2013-03-20 23:38:04

Build Class: Genome::Model::Build::SomaticVariation
Software Revision: /gsc/scripts/opt/genome/snapshots/genome-3308/lib/perl/etc/perl:/usr/local/lib/site_perl
SoftwareResult Test Name(s): undef (9)
Data Directory: /gscmnt/gc13001/info/model_data/2891454547/build135798051

=== Workflow ===
ID: 43829885              Name: 135798051 Somatic Variation Pipeline
Started: 2013-03-18 14:52:59   Ended: 2013-03-20 23:37:58
User: mgriffit             Cache ID: 2743347

ID      Status  LSF ID      Start Time      Time Elapsed     Name
43829885 done     369510     2013-03-18 14:52:59  2d 08:44:59  135798051 Somatic Variation Pipeline
43829888 done     369510     2013-03-18 14:53:07  2d 07:36:00  Detect Variants
43829906 done     396424     2013-03-18 14:53:16  2d 06:27:23  DetectVariants2 Dispatcher
43829909 done     396424     2013-03-18 20:16:40  1d 22:58:22  indel varscan-somatic 2.2.6 #1
43829915 done     396409     2013-03-18 20:16:35  06:54:01    indel strelka 0.4.6.2 #3
43829917 done     369743     2013-03-18 14:53:51  06:32:16    cnv plot-cnv v1 #1
43829946 done     369743     2013-03-18 14:54:03  06:31:41    Plot Segments From Bams
43829950 done     369766     2013-03-18 14:54:11  04:22:54    normal bam-to-cn
43829949 done     369767     2013-03-18 14:54:12  06:04:15    tumor bam-to-cn
43829952 done     392434     2013-03-18 19:18:13  00:17:13    normal cnv-seg
43829951 done     399503     2013-03-18 20:59:35  00:24:00    tumor cnv-seg
43829953 done     399677     2013-03-18 21:24:42  00:00:02    plot segments
43829918 done     369702     2013-03-18 14:53:33  06:08:27    snv sniper 1.0.2 #4
43829921 done     shortcut   2013-03-18 14:53:54  05:22:25    indel pindel 0.5 #1
43829954 done     369772     2013-03-18 14:54:08  03:35:22    Pindel Detect Variants Module
43829957 done     369772     2013-03-18 14:54:17  03:34:12    Pindel
43829958 done     370210     2013-03-18 14:56:54  03:04:12    Pindel
43829959 done     370216     2013-03-18 14:57:19  02:14:10    Pindel
43829960 done     370222     2013-03-18 14:56:59  02:26:31    Pindel
43829961 done     370224     2013-03-18 14:57:00  02:02:54    Pindel
43829962 done     370228     2013-03-18 14:57:06  01:54:38    Pindel
43829963 done     370236     2013-03-18 14:57:05  03:08:22    Pindel
43829964 done     370237     2013-03-18 14:57:10  01:48:18    Pindel
43829965 done     370160     2013-03-18 14:56:32  01:17:04    Pindel
43829966 done     370163     2013-03-18 14:56:31  02:04:55    Pindel
43829967 done     370174     2013-03-18 14:57:01  01:33:52    Pindel
43829968 done     370177     2013-03-18 14:56:37  01:26:38    Pindel
43829969 done     370181     2013-03-18 14:56:40  01:04:19    Pindel
43829970 done     370185     2013-03-18 14:56:42  01:13:07    Pindel
43829971 done     370188     2013-03-18 14:56:43  00:58:46    Pindel
43829972 done     370193     2013-03-18 14:56:44  01:02:21    Pindel
43829973 done     370198     2013-03-18 14:56:48  01:05:06    Pindel
43829974 done     370201     2013-03-18 14:56:49  01:11:05    Pindel
43829975 done     370206     2013-03-18 14:56:49  01:05:41    Pindel
43829976 done     370208     2013-03-18 14:56:55  00:49:58    Pindel
43829977 done     370114     2013-03-18 14:56:10  00:35:44    Pindel
43829978 done     370115     2013-03-18 14:56:09  00:32:06    Pindel
43829979 done     370119     2013-03-18 14:56:09  00:50:56    Pindel
43829980 done     370124     2013-03-18 14:56:13  00:04:43    Pindel
43829981 done     370129     2013-03-18 14:56:15  00:01:11    Pindel
```

## B. GMS build report, subordinate workflows

| ssmith — ssmith@blade14-2-16: ~ — ssh — 204x60 |      |          |                     |          |                                                                    |
|------------------------------------------------|------|----------|---------------------|----------|--------------------------------------------------------------------|
| 43830040                                       | done | 369827   | 2013-03-18 14:54:46 | 00:06:17 | Pindel                                                             |
| 43849761                                       | done |          | 2013-03-18 19:55:15 | 00:20:56 | Multi-Vcf Merge                                                    |
| 43849764                                       | done | 394763   | 2013-03-18 19:55:23 | 00:19:48 | Pindel2Vcf                                                         |
| 43829925                                       | done | 369718   | 2013-03-18 14:53:40 | 12:27:05 | sv breakdancer 1.3 #7                                              |
| 43829928                                       | done | 369726   | 2013-03-18 14:53:40 | 01:03:17 | sv breakdancer 1.3 #8                                              |
| 43830058                                       | done | 370086   | 2013-03-18 14:55:51 | 00:57:30 | Breakdancer by chromosome                                          |
| 43830059                                       | done | 370162   | 2013-03-18 14:56:31 | 00:58:35 | Breakdancer by chromosome                                          |
| 43830060                                       | done | 370175   | 2013-03-18 14:56:40 | 00:38:22 | Breakdancer by chromosome                                          |
| 43830061                                       | done | 370179   | 2013-03-18 14:56:51 | 00:56:15 | Breakdancer by chromosome                                          |
| 43830062                                       | done | 370186   | 2013-03-18 14:56:43 | 00:44:13 | Breakdancer by chromosome                                          |
| 43830063                                       | done | 370192   | 2013-03-18 14:56:42 | 00:33:07 | Breakdancer by chromosome                                          |
| 43830064                                       | done | 370199   | 2013-03-18 14:56:48 | 00:47:26 | Breakdancer by chromosome                                          |
| 43830065                                       | done | 370202   | 2013-03-18 14:56:48 | 00:31:28 | Breakdancer by chromosome                                          |
| 43830066                                       | done | 370207   | 2013-03-18 14:56:55 | 00:29:24 | Breakdancer by chromosome                                          |
| 43830067                                       | done | 370211   | 2013-03-18 14:56:54 | 00:27:43 | Breakdancer by chromosome                                          |
| 43830068                                       | done | 370219   | 2013-03-18 14:57:00 | 00:32:57 | Breakdancer by chromosome                                          |
| 43830069                                       | done | 370226   | 2013-03-18 14:56:59 | 00:31:53 | Breakdancer by chromosome                                          |
| 43830070                                       | done | 370095   | 2013-03-18 14:55:56 | 00:21:45 | Breakdancer by chromosome                                          |
| 43830071                                       | done | 370098   | 2013-03-18 14:55:58 | 00:21:20 | Breakdancer by chromosome                                          |
| 43830072                                       | done | 370105   | 2013-03-18 14:56:02 | 00:28:35 | Breakdancer by chromosome                                          |
| 43830073                                       | done | 370111   | 2013-03-18 14:56:01 | 00:36:22 | Breakdancer by chromosome                                          |
| 43830074                                       | done | 370116   | 2013-03-18 14:56:07 | 00:21:00 | Breakdancer by chromosome                                          |
| 43830075                                       | done | 370120   | 2013-03-18 14:56:10 | 00:15:58 | Breakdancer by chromosome                                          |
| 43830076                                       | done | 370125   | 2013-03-18 14:56:16 | 00:14:26 | Breakdancer by chromosome                                          |
| 43830077                                       | done | 370130   | 2013-03-18 14:56:15 | 00:13:03 | Breakdancer by chromosome                                          |
| 43830078                                       | done | 370135   | 2013-03-18 14:56:21 | 00:07:22 | Breakdancer by chromosome                                          |
| 43830079                                       | done | 370137   | 2013-03-18 14:56:19 | 00:12:09 | Breakdancer by chromosome                                          |
| 43830080                                       | done | 370148   | 2013-03-18 14:56:25 | 00:21:32 | Breakdancer by chromosome                                          |
| 43830081                                       | done | 370150   | 2013-03-18 14:56:26 | 00:01:10 | Breakdancer by chromosome                                          |
| 43830082                                       | done | 370158   | 2013-03-18 14:56:32 | 00:01:31 | Breakdancer by chromosome                                          |
| 43829930                                       | done | 369528   | 2013-03-18 14:53:27 | 02:37:40 | cnv bam-to-cna v1 #1                                               |
| 43829931                                       | done | 369688   | 2013-03-18 14:53:26 | 10:13:17 | snv samtools r963 #9                                               |
| 43829933                                       | done | 369739   | 2013-03-18 14:53:49 | 12:01:33 | sv squaredancer 0.1 #1                                             |
| 43829935                                       | done | 369746   | 2013-03-18 14:53:56 | 11:39:44 | indel gatk-somatic-indel 5336 #1                                   |
| 43829910                                       | done | 496673   | 2013-03-20 19:16:12 | 00:02:24 | indel_varscan-somatic_2.2.6_#1 varscan-high-confidence-indel v1 #1 |
| 43829912                                       | done | shortcut | 2013-03-20 19:16:10 | 00:00:01 | snv varscan-somatic 2.2.6 #1                                       |
| 43829916                                       | done | shortcut | 2013-03-19 03:11:37 | 00:00:01 | snv strelka 0.4.6.2 #3                                             |
| 43829919                                       | done | 399513   | 2013-03-18 21:03:07 | 15:48:15 | snv sniper_1.0.2_#4 false-positive v1 #2                           |
| 43829922                                       | done | 396360   | 2013-03-18 20:16:29 | 02:03:13 | indel_pindel_0.5_#1 pindel-somatic-calls v1 #1                     |
| 43829926                                       | done | 404436   | 2013-03-19 03:21:54 | 05:27:52 | sv_breakdancer_1.3_#7 novo-realign v1 #1                           |
| 43829929                                       | done | 396384   | 2013-03-18 20:16:36 | 06:23:13 | sv_breakdancer_1.3_#8 tigma-validation v1 #1                       |
| 43852074                                       | done | 396561   | 2013-03-18 20:17:04 | 04:45:38 | Tigma by chromosome                                                |
| 43852075                                       | done | 396902   | 2013-03-18 20:17:55 | 04:49:45 | Tigma by chromosome                                                |
| 43852076                                       | done | 396908   | 2013-03-18 20:18:01 | 03:25:31 | Tigma by chromosome                                                |
| 43852077                                       | done | 396925   | 2013-03-18 20:18:02 | 05:29:37 | Tigma by chromosome                                                |
| 43852078                                       | done | 396938   | 2013-03-18 20:18:07 | 02:56:47 | Tigma by chromosome                                                |
| 43852079                                       | done | 396943   | 2013-03-18 20:18:09 | 02:53:05 | Tigma by chromosome                                                |
| 43852080                                       | done | 396969   | 2013-03-18 20:18:13 | 06:18:47 | Tigma by chromosome                                                |
| 43852081                                       | done | 396989   | 2013-03-18 20:18:12 | 03:16:47 | Tigma by chromosome                                                |
| 43852082                                       | done | 397013   | 2013-03-18 20:18:19 | 02:10:56 | Tigma by chromosome                                                |
| 43852083                                       | done | 397040   | 2013-03-18 20:18:24 | 01:51:11 | Tigma by chromosome                                                |
| 43852084                                       | done | 396578   | 2013-03-18 20:17:08 | 01:37:22 | Tigma by chromosome                                                |
| 43852085                                       | done | 396598   | 2013-03-18 20:17:11 | 01:55:34 | Tigma by chromosome                                                |
| 43852086                                       | done | 396603   | 2013-03-18 20:17:15 | 01:11:36 | Tigma by chromosome                                                |
| 43852087                                       | done | 396633   | 2013-03-18 20:17:20 | 03:05:45 | Tigma by chromosome                                                |
| 43852088                                       | done | 396656   | 2013-03-18 20:17:20 | 01:26:17 | Tigma by chromosome                                                |
| 43852089                                       | done | 396671   | 2013-03-18 20:17:26 | 03:33:39 | Tigma by chromosome                                                |
| 43852090                                       | done | 396703   | 2013-03-18 20:17:27 | 01:30:20 | Tigma by chromosome                                                |
| 43852091                                       | done | 396725   | 2013-03-18 20:17:35 | 01:35:22 | Tigma by chromosome                                                |
| 43852092                                       | done | 396745   | 2013-03-18 20:17:37 | 00:48:28 | Tigma by chromosome                                                |

C.GMS build report, subordinate workflows - continued

| Job ID   | Status | Job ID | Start Time          | End Time | Description                                                  |
|----------|--------|--------|---------------------|----------|--------------------------------------------------------------|
| 43852092 | done   | 396745 | 2013-03-18 20:17:37 | 00:48:28 | Tigra by chromosome                                          |
| 43852093 | done   | 396764 | 2013-03-18 20:17:37 | 01:04:45 | Tigra by chromosome                                          |
| 43852094 | done   | 396782 | 2013-03-18 20:17:44 | 00:31:32 | Tigra by chromosome                                          |
| 43852095 | done   | 396789 | 2013-03-18 20:17:43 | 01:06:08 | Tigra by chromosome                                          |
| 43852096 | done   | 396805 | 2013-03-18 20:17:49 | 01:05:51 | Tigra by chromosome                                          |
| 43852097 | done   | 396835 | 2013-03-18 20:17:50 | 00:15:24 | Tigra by chromosome                                          |
| 43852098 | done   | 396874 | 2013-03-18 20:17:55 | 00:00:22 | Tigra by chromosome                                          |
| 43829942 | done   | 399684 | 2013-03-18 21:27:15 | 00:00:10 | union cnv_bam-to-cna_v1_#1 cnv_plot-cnv_v1_#1                |
| 43829932 | done   | 403802 | 2013-03-19 01:07:53 | 00:09:40 | snv_samtools_r963_#9 snp-filter v1 #1                        |
| 43829934 | done   | 404327 | 2013-03-19 02:56:29 | 00:40:30 | sv_squaredancer_0.1_#1 tigra-validation v1 #1                |
| 43858170 | done   | 404328 | 2013-03-19 02:56:46 | 00:21:15 | Tigra by chromosome                                          |
| 43858171 | done   | 404345 | 2013-03-19 02:57:39 | 00:20:01 | Tigra by chromosome                                          |
| 43858172 | done   | 404346 | 2013-03-19 02:57:40 | 00:22:45 | Tigra by chromosome                                          |
| 43858173 | done   | 404347 | 2013-03-19 02:57:47 | 00:36:29 | Tigra by chromosome                                          |
| 43858174 | done   | 404348 | 2013-03-19 02:57:46 | 00:31:16 | Tigra by chromosome                                          |
| 43858175 | done   | 404349 | 2013-03-19 02:57:51 | 00:33:13 | Tigra by chromosome                                          |
| 43858176 | done   | 404350 | 2013-03-19 02:57:53 | 00:35:58 | Tigra by chromosome                                          |
| 43858177 | done   | 404351 | 2013-03-19 02:58:00 | 00:25:52 | Tigra by chromosome                                          |
| 43858178 | done   | 404353 | 2013-03-19 02:58:04 | 00:24:43 | Tigra by chromosome                                          |
| 43858179 | done   | 404354 | 2013-03-19 02:58:04 | 00:24:24 | Tigra by chromosome                                          |
| 43858180 | done   | 404329 | 2013-03-19 02:56:53 | 00:25:46 | Tigra by chromosome                                          |
| 43858181 | done   | 404330 | 2013-03-19 02:56:52 | 00:21:43 | Tigra by chromosome                                          |
| 43858182 | done   | 404331 | 2013-03-19 02:56:58 | 00:18:45 | Tigra by chromosome                                          |
| 43858183 | done   | 404332 | 2013-03-19 02:56:58 | 00:25:23 | Tigra by chromosome                                          |
| 43858184 | done   | 404333 | 2013-03-19 02:57:04 | 00:18:26 | Tigra by chromosome                                          |
| 43858185 | done   | 404334 | 2013-03-19 02:57:04 | 00:17:43 | Tigra by chromosome                                          |
| 43858186 | done   | 404335 | 2013-03-19 02:57:10 | 00:24:55 | Tigra by chromosome                                          |
| 43858187 | done   | 404336 | 2013-03-19 02:57:10 | 00:20:43 | Tigra by chromosome                                          |
| 43858188 | done   | 404337 | 2013-03-19 02:57:18 | 00:24:49 | Tigra by chromosome                                          |
| 43858189 | done   | 404338 | 2013-03-19 02:57:21 | 00:16:24 | Tigra by chromosome                                          |
| 43858190 | done   | 404339 | 2013-03-19 02:57:21 | 00:11:47 | Tigra by chromosome                                          |
| 43858191 | done   | 404340 | 2013-03-19 02:57:27 | 00:11:23 | Tigra by chromosome                                          |
| 43858192 | done   | 404341 | 2013-03-19 02:57:28 | 00:12:26 | Tigra by chromosome                                          |
| 43858193 | done   | 404342 | 2013-03-19 02:57:34 | 00:06:31 | Tigra by chromosome                                          |
| 43858194 | done   | 404344 | 2013-03-19 02:57:34 | 00:00:55 | Tigra by chromosome                                          |
| 43829936 | done   | 404035 | 2013-03-19 02:34:51 | 00:30:24 | indel_gatk-somatic-indel_5336_#1 false-indel v1 #2           |
| 43829911 | done   | 496870 | 2013-03-20 19:19:46 | 00:59:39 | indel_varscaan-somatic_2.2.6_#1 false-indel v1 #2            |
| 43829913 | done   | 496678 | 2013-03-20 19:16:23 | 00:09:22 | snv_varscaan-somatic_2.2.6_#1 varscaan-high-confidence v1 #1 |
| 43829920 | done   | 416781 | 2013-03-19 12:52:31 | 03:43:40 | snv_sniper_1.0.2_#4 somatic-score-mapping-quality v1 #5      |
| 43829923 | done   | 401439 | 2013-03-18 22:20:54 | 06:19:16 | indel_pindel_0.5_#1 pindel-vaf-filter v1 #6                  |
| 43829927 | done   | 407519 | 2013-03-19 08:50:56 | 01:27:34 | sv_breakdancer_1.3_#7 tigra-validation v1 #1                 |
| 43859105 | done   | 407521 | 2013-03-19 08:51:18 | 00:05:46 | Tigra by chromosome                                          |
| 43859106 | done   | 407533 | 2013-03-19 08:51:53 | 00:08:34 | Tigra by chromosome                                          |
| 43859107 | done   | 407534 | 2013-03-19 08:51:58 | 00:08:57 | Tigra by chromosome                                          |
| 43859108 | done   | 407552 | 2013-03-19 08:52:03 | 00:10:08 | Tigra by chromosome                                          |
| 43859109 | done   | 407571 | 2013-03-19 08:52:04 | 00:19:26 | Tigra by chromosome                                          |
| 43859110 | done   | 407572 | 2013-03-19 08:52:09 | 00:26:57 | Tigra by chromosome                                          |
| 43859111 | done   | 407573 | 2013-03-19 08:52:09 | 00:23:08 | Tigra by chromosome                                          |
| 43859112 | done   | 407574 | 2013-03-19 08:52:15 | 00:14:33 | Tigra by chromosome                                          |
| 43859113 | done   | 407575 | 2013-03-19 08:52:15 | 00:43:36 | Tigra by chromosome                                          |
| 43859114 | done   | 407576 | 2013-03-19 08:52:21 | 00:25:30 | Tigra by chromosome                                          |
| 43859115 | done   | 407577 | 2013-03-19 08:52:21 | 00:45:56 | Tigra by chromosome                                          |
| 43859116 | done   | 407578 | 2013-03-19 08:52:26 | 00:11:06 | Tigra by chromosome                                          |
| 43859117 | done   | 407579 | 2013-03-19 08:52:32 | 00:20:08 | Tigra by chromosome                                          |
| 43859118 | done   | 407581 | 2013-03-19 08:52:32 | 00:19:56 | Tigra by chromosome                                          |
| 43859119 | done   | 407522 | 2013-03-19 08:51:18 | 00:56:51 | Tigra by chromosome                                          |
| 43859120 | done   | 407523 | 2013-03-19 08:51:24 | 00:28:05 | Tigra by chromosome                                          |
| 43859121 | done   | 407524 | 2013-03-19 08:51:30 | 00:29:05 | Tigra by chromosome                                          |
| 43859122 | done   | 407526 | 2013-03-19 08:51:29 | 00:21:40 | Tigra by chromosome                                          |
| 43859123 | done   | 407527 | 2013-03-19 08:51:36 | 00:42:34 | Tigra by chromosome                                          |

## D. GMS build report, subordinate workflows - continued

```

ssmith@blade14-2-16: ~ -- ssh -- 204x60

```

|          |      |        |                     |          |                                                                                                                                               |
|----------|------|--------|---------------------|----------|-----------------------------------------------------------------------------------------------------------------------------------------------|
| 43858181 | done | 404330 | 2013-03-19 02:56:52 | 00:21:43 | Tigra by chromosome                                                                                                                           |
| 43858182 | done | 404331 | 2013-03-19 02:56:58 | 00:18:45 | Tigra by chromosome                                                                                                                           |
| 43858183 | done | 404332 | 2013-03-19 02:56:58 | 00:25:23 | Tigra by chromosome                                                                                                                           |
| 43858184 | done | 404333 | 2013-03-19 02:57:04 | 00:18:26 | Tigra by chromosome                                                                                                                           |
| 43858185 | done | 404334 | 2013-03-19 02:57:04 | 00:17:43 | Tigra by chromosome                                                                                                                           |
| 43858186 | done | 404335 | 2013-03-19 02:57:10 | 00:24:55 | Tigra by chromosome                                                                                                                           |
| 43858187 | done | 404336 | 2013-03-19 02:57:10 | 00:20:43 | Tigra by chromosome                                                                                                                           |
| 43858188 | done | 404337 | 2013-03-19 02:57:18 | 00:24:49 | Tigra by chromosome                                                                                                                           |
| 43858189 | done | 404338 | 2013-03-19 02:57:21 | 00:16:24 | Tigra by chromosome                                                                                                                           |
| 43858190 | done | 404339 | 2013-03-19 02:57:21 | 00:11:47 | Tigra by chromosome                                                                                                                           |
| 43858191 | done | 404340 | 2013-03-19 02:57:27 | 00:11:23 | Tigra by chromosome                                                                                                                           |
| 43858192 | done | 404341 | 2013-03-19 02:57:28 | 00:12:26 | Tigra by chromosome                                                                                                                           |
| 43858193 | done | 404342 | 2013-03-19 02:57:34 | 00:06:31 | Tigra by chromosome                                                                                                                           |
| 43858194 | done | 404344 | 2013-03-19 02:57:34 | 00:00:55 | Tigra by chromosome                                                                                                                           |
| 43829936 | done | 404835 | 2013-03-20 02:34:51 | 00:30:24 | indel_gatk-somatic-indel_5336_#1 false-indel v1 #2                                                                                            |
| 43829911 | done | 496870 | 2013-03-20 19:19:46 | 00:59:39 | indel_varscan-somatic_2.2.6_#1 false-indel v1 #2                                                                                              |
| 43829913 | done | 496878 | 2013-03-20 19:16:23 | 00:09:22 | snv_varscan-somatic_2.2.6_#1 varscan-high-confidence v1 #1                                                                                    |
| 43829920 | done | 416781 | 2013-03-19 12:52:31 | 03:43:40 | snv_sniper_1.0.2_#4 somatic-score-mapping-quality v1 #5                                                                                       |
| 43829923 | done | 401439 | 2013-03-19 22:20:54 | 06:19:16 | indel_pindel_0.5_#1 pindel-vaf-filter v1 #6                                                                                                   |
| 43829927 | done | 407519 | 2013-03-19 08:50:56 | 01:27:34 | sv_breakdancer_1.3_#7 tigra-validation v1 #1                                                                                                  |
| 43859105 | done | 407521 | 2013-03-19 08:51:18 | 00:05:46 | Tigra by chromosome                                                                                                                           |
| 43859106 | done | 407533 | 2013-03-19 08:51:53 | 00:00:34 | Tigra by chromosome                                                                                                                           |
| 43859107 | done | 407534 | 2013-03-19 08:51:58 | 00:00:57 | Tigra by chromosome                                                                                                                           |
| 43859108 | done | 407552 | 2013-03-19 08:52:03 | 00:10:08 | Tigra by chromosome                                                                                                                           |
| 43859109 | done | 407571 | 2013-03-19 08:52:04 | 00:19:26 | Tigra by chromosome                                                                                                                           |
| 43859110 | done | 407572 | 2013-03-19 08:52:09 | 00:26:57 | Tigra by chromosome                                                                                                                           |
| 43859111 | done | 407573 | 2013-03-19 08:52:09 | 00:23:00 | Tigra by chromosome                                                                                                                           |
| 43859112 | done | 407574 | 2013-03-19 08:52:15 | 00:14:33 | Tigra by chromosome                                                                                                                           |
| 43859113 | done | 407575 | 2013-03-19 08:52:15 | 00:43:36 | Tigra by chromosome                                                                                                                           |
| 43859114 | done | 407576 | 2013-03-19 08:52:21 | 00:25:30 | Tigra by chromosome                                                                                                                           |
| 43859115 | done | 407577 | 2013-03-19 08:52:21 | 00:45:56 | Tigra by chromosome                                                                                                                           |
| 43859116 | done | 407578 | 2013-03-19 08:52:26 | 00:11:06 | Tigra by chromosome                                                                                                                           |
| 43859117 | done | 407579 | 2013-03-19 08:52:32 | 00:20:08 | Tigra by chromosome                                                                                                                           |
| 43859118 | done | 407581 | 2013-03-19 08:52:32 | 00:19:56 | Tigra by chromosome                                                                                                                           |
| 43859119 | done | 407522 | 2013-03-19 08:51:18 | 00:56:51 | Tigra by chromosome                                                                                                                           |
| 43859120 | done | 407523 | 2013-03-19 08:51:24 | 00:28:05 | Tigra by chromosome                                                                                                                           |
| 43859121 | done | 407524 | 2013-03-19 08:51:30 | 00:29:05 | Tigra by chromosome                                                                                                                           |
| 43859122 | done | 407526 | 2013-03-19 08:51:29 | 00:21:40 | Tigra by chromosome                                                                                                                           |
| 43859123 | done | 407527 | 2013-03-19 08:51:36 | 00:42:34 | Tigra by chromosome                                                                                                                           |
| 43859124 | done | 407528 | 2013-03-19 08:51:38 | 01:24:19 | Tigra by chromosome                                                                                                                           |
| 43859125 | done | 407529 | 2013-03-19 08:51:41 | 00:22:32 | Tigra by chromosome                                                                                                                           |
| 43859126 | done | 407530 | 2013-03-19 08:51:41 | 00:28:46 | Tigra by chromosome                                                                                                                           |
| 43859127 | done | 407531 | 2013-03-19 08:51:47 | 00:35:58 | Tigra by chromosome                                                                                                                           |
| 43859128 | done | 407532 | 2013-03-19 08:51:52 | 00:00:28 | Tigra by chromosome                                                                                                                           |
| 43829939 | done | 581204 | 2013-03-20 20:20:34 | 00:01:00 | unionunique indel_varscan-somatic_2.2.6_#1 indel_strelka_0.4.6.2_#3                                                                           |
| 43829914 | done | 497428 | 2013-03-20 19:26:54 | 01:29:08 | snv_varscan-somatic_2.2.6_#1 false-positive v1 #2                                                                                             |
| 43829943 | done | 432306 | 2013-03-19 16:37:16 | 00:06:07 | intersect_snv_santools_r963_#9 snv_sniper_1.0.2_#4                                                                                            |
| 43829924 | done | 405162 | 2013-03-19 04:41:23 | 00:38:45 | indel_pindel_0.5_#1 pindel-read-support v1 #1                                                                                                 |
| 43829937 | done | 409395 | 2013-03-19 10:19:39 | 00:00:12 | union sv_breakdancer_1.3_#7 sv_breakdancer_1.3_#8                                                                                             |
| 43829944 | done | 502579 | 2013-03-20 20:57:15 | 00:06:20 | unionunique snv_varscan-somatic_2.2.6_#1 snv_strelka_0.4.6.2_#3                                                                               |
| 43829940 | done | 501342 | 2013-03-20 20:22:43 | 00:03:44 | unionunique indel_pindel_0.5_#1 unionunique-indel_varscan-somatic_2.2.6_1-indel_strelka_0.4.6.2_3                                             |
| 43829938 | done | 409439 | 2013-03-19 10:20:58 | 00:00:12 | union union-sv_breakdancer_1.3_7-sv_breakdancer_1.3_8 sv_squaredancer_0.1_#1                                                                  |
| 43829945 | done | 503025 | 2013-03-20 21:04:45 | 00:14:54 | unionunique intersect-snv_santools_r963_9-snv_sniper_1.0.2_4 unionunique-snv_varscan-somatic_2.2.6_1-snv_strelka_0.4.6.2_3                    |
| 43829941 | done | 501611 | 2013-03-20 20:27:36 | 00:01:07 | unionunique indel_gatk-somatic-indel_5336_#1 unionunique-indel_pindel_0.5_1-unionunique-indel_varscan-somatic_2.2.6_1-indel_strelka_0.4.6.2_3 |
| 43829889 | done | 504072 | 2013-03-20 22:30:19 | 00:00:37 | Identify LOH                                                                                                                                  |
| 43829890 | done | 504073 | 2013-03-20 22:32:11 | 00:00:11 | Identify Previously Discovered Variations                                                                                                     |
| 43829891 | done | 504074 | 2013-03-20 22:33:32 | 00:02:04 | Tier Variants                                                                                                                                 |
| 43829892 | done | 504078 | 2013-03-20 22:36:43 | 01:00:15 | Annotate And Upload Variants                                                                                                                  |

```

ssmith@blade14-2-16 -->

```
