# Supplementary material for: Genome Modeling System: A Knowledge Management Platform for Genomics
Source: PubMed Central journal article supplement (PMC4497734; doi:10.1371/journal.pcbi.1004274), 2015-07-09
Supplement: pcbi.1004274.s014.pdf [file pcbi.1004274.s014.pdf]

## A. Summary of existing builds

 Genome Modeling System GMS ID: RH9YB64

[Models](#) [Processing Profiles](#) [Instrument Data](#) [Subjects](#) [Builds](#)

10  records per page

| Build                            | Status    | Model                     |
|----------------------------------|-----------|---------------------------|
| 106942997                        | Succeeded | GRCh37-lite               |
| 108563338                        | Succeeded | nimblegen-human           |
| 124434505                        | Succeeded | NCBI-human.ensembl        |
| 127786607                        | Succeeded | dbsnp-GRCh37-lite-build37 |
| 27f279a6f9ff4e5990f9e5c57c7c009b | Succeeded | hcc1395-tumor-snparray    |
| 2a9668308dbc45ebb3629685f419b05c | Succeeded | hcc1395-normal-snparray   |
| 2fe02ce7e95d4af5932f822d441fd77  | Scheduled | hcc1395-tumor-snparray    |
| 4051270386394d26947c394225fbf68d | Succeeded | hcc1395-normal-snparray   |
| 45938db266f6481a9d3a17762b4da570 | Scheduled | hcc1395-tumor-snparray    |
| 46e9f1eba1c84d69bc7c3947fce6dab2 | Scheduled | hcc1395-normal-snparray   |

Showing 1 to 10 of 16 entries

[← Previous](#) [1](#) [2](#) [Next →](#)

## B. Sample view for a single sample

### H\_NJ-HCC1395 sample

| Attribute    | Value      |
|--------------|------------|
| upn          | HCC1395    |
| ethnicity    | Caucasian  |
| nomenclature | GC         |
| gender       | female     |
| taxon_id     | 1653198737 |
| common_name  | TST1       |

**Taxon**  
[human](#)

## C. Detailed summary for a single build

173248c1921443eeb345f32c9930dd39

### hcc1395-normal-refalign-exome build

| Attribute          | Value                                                                          |
|--------------------|--------------------------------------------------------------------------------|
| status             | Succeeded                                                                      |
| user               | ubuntu                                                                         |
| model              | <a href="#">2891377978</a>                                                     |
| subject            | <a href="#">2899861254</a>                                                     |
| files              | <a href="#">data</a> <a href="#">errors</a> <a href="#">output</a>             |
| processing_profile | <a href="#">Default Reference Alignment</a>                                    |
| workflow           | 173248c1921443eeb345f32c9930dd39 all stages (c6ad983597a442b9a478d61779b549f1) |

### Inputs

| Attribute                   | Value                                                  |
|-----------------------------|--------------------------------------------------------|
| dbsnp_build                 | <a href="#">build 127786807</a>                        |
| instrument_data             | <a href="#">instrument data 2891351088</a>             |
| reference_sequence_build    | <a href="#">build 106942997</a>                        |
| genotype_microarray         | <a href="#">build b17b849be38548fcb9196da3dcd61a30</a> |
| region_of_interest_set_name | NimbleGen v3 Capture Chip Set                          |
| target_region_set_name      | NimbleGen v3 Capture Chip Set                          |
| annotation_reference_build  | <a href="#">build 124434505</a>                        |

## D. Status of workflow steps

### Workflow

173248c1921443eeb345f32c9930dd39 all stages /

| Name                                                                                      | Status | LSF id | Started At                 | Finished At                | Elapsed               | Stdout | Stderr |
|-------------------------------------------------------------------------------------------|--------|--------|----------------------------|----------------------------|-----------------------|--------|--------|
| prepare-reference-sequence-index<br>1dfea28c59014b99923f86d9e23526bb                      | Done   | P18468 | 2015-03-19<br>14:08:35 UTC | 2015-03-19<br>14:08:37 UTC | less than a<br>minute | Output | Errors |
| align-reads 047c4fc70a4840dea9f2e77f468a77bf                                              | Done   | 114    | 2015-03-19<br>14:08:49 UTC | 2015-03-19<br>14:11:19 UTC | 3 minutes             | Output | Errors |
| <a href="#">bam-qc b78b63ab98494207957e22384b3a4a12</a> <input type="checkbox"/>          | Done   | 115    | 2015-03-19<br>14:12:30 UTC | 2015-03-19<br>14:14:59 UTC | 2 minutes             | Output | Errors |
| merge-alignments 9a3eac7f71414af89baa470b7047c320                                         | Done   | 121    | 2015-03-19<br>14:16:09 UTC | 2015-03-19<br>14:16:35 UTC | less than a<br>minute | Output | Errors |
| <a href="#">coverage-stats 0eea7a1a320f4f1bac091c4ede89d761</a> <input type="checkbox"/>  | Done   | 122    | 2015-03-19<br>14:17:49 UTC | 2015-03-19<br>14:48:51 UTC | 31 minutes            | Output | Errors |
| <a href="#">detect-variants 99f177ba53004341bfad14373084d540</a> <input type="checkbox"/> | Done   | 131    | 2015-03-19<br>14:49:59 UTC | 2015-03-19<br>14:56:41 UTC | 7 minutes             | Output | Errors |
| annotate-adaptor 3c0fda69ec83491393f05a8dceb1d8a3                                         | Done   | 135    | 2015-03-19<br>14:57:49 UTC | 2015-03-19<br>14:57:52 UTC | less than a<br>minute | Output | Errors |
| annotate-transcript-variants<br>da69f86c212c4892b7d23ee3f30e507c                          | Done   | 136    | 2015-03-19<br>14:58:59 UTC | 2015-03-19<br>15:02:07 UTC | 3 minutes             | Output | Errors |
| run-reports 1a7b459f5d0a4bda8ae7681ad6af43e5                                              | Done   | 137    | 2015-03-19<br>15:03:20 UTC | 2015-03-19<br>15:06:32 UTC | 3 minutes             | Output | Errors |
