# Supplementary material for: Genome Modeling System: A Knowledge Management Platform for Genomics
Source: PubMed Central journal article supplement (PMC4497734; doi:10.1371/journal.pcbi.1004274), 2015-07-09
Supplement: pcbi.1004274.s016.pdf [file pcbi.1004274.s016.pdf]

**S1 Table. HCC1395/BL whole genome (DNA) sequence metrics**

| <b>Metric</b>                                                                 | <b>Tumor</b>              | <b>Normal</b>             |
|-------------------------------------------------------------------------------|---------------------------|---------------------------|
| Library median insert sizes<br>(3 libraries were created for each DNA sample) | 259 bp, 366 bp,<br>513 bp | 252 bp, 358 bp,<br>522 bp |
| Read 1 / Read 2 average error rates                                           | 0.34 / 0.37               | 0.31 / 0.36               |
| Total read count<br>(2 x 100 bp reads)                                        | 941,755,727               | 515,536,028               |
| Sequence amount (gpb)                                                         | 188.4                     | 103.1                     |
| Haploid coverage                                                              | 56x                       | 31x                       |
| Mapped read percentage                                                        | 95.2%                     | 95.0%                     |
| Duplicate read percentage                                                     | 5.3%                      | 3.0%                      |
| WGS SNP versus microarray SNP concordance                                     | 98.7%                     | 99.6%                     |
| WGS SNP versus dbSNP concordance                                              | 94.5%                     | 96.2%                     |

Average error rates are reported per base position in the read. Reads were mapped by BWA and duplicate read percentages were determined by Picard MarkDuplicates. Microarray SNP genotype concordance was determined by comparing genotypes from Illumina Infinium arrays to genotypes determined from the WGS sequence data. WGS 'SNP versus dbSNP' concordance refers to the percentage of variant positions observed in the sequence data that correspond to a known SNP from dbSNP.
