# Supplementary material for: Genome Modeling System: A Knowledge Management Platform for Genomics
Source: PubMed Central journal article supplement (PMC4497734; doi:10.1371/journal.pcbi.1004274), 2015-07-09
Supplement: pcbi.1004274.s017.pdf [file pcbi.1004274.s017.pdf]

**S2 Table. HCC1395/BL whole exome (DNA) sequence metrics**

| <b>Metric</b>                                               | <b>Tumor</b> | <b>Normal</b> |
|-------------------------------------------------------------|--------------|---------------|
| Library median insert size                                  | 239 bp       | 243 bp        |
| Read 1/Read 2 average error rates                           | 0.21 / 0.24  | 0.21 / 0.23   |
| Total read count<br>(2 x 100 bp reads)                      | 96,056,889   | 77,667,085    |
| Sequence amount (gpb)                                       | 19.2         | 15.5          |
| Mapped read percentage                                      | 99.0%        | 99.0%         |
| Percent exons sequenced >20X over<br>>80% of base positions | 95.6%        | 95.3%         |
| Median coverage of targeted bases                           | 155x         | 124x          |
