# Supplementary material for: Genome Modeling System: A Knowledge Management Platform for Genomics
Source: PubMed Central journal article supplement (PMC4497734; doi:10.1371/journal.pcbi.1004274), 2015-07-09
Supplement: pcbi.1004274.s018.pdf [file pcbi.1004274.s018.pdf]

**S3 Table. HCC1395/BL transcriptome (RNA) sequence metrics**

| <b>Metric</b>                                                        | <b>Tumor</b> | <b>Normal</b> |
|----------------------------------------------------------------------|--------------|---------------|
| Library median insert size                                           | 220 bp       | 281 bp        |
| Total read count<br>(2 x 100 bp reads)                               | 156,248,832  | 170,049,877   |
| Mapped read percentage                                               | 81.7%        | 78.1%         |
| Percent coding bases                                                 | 53.5%        | 56.4%         |
| Percent UTR bases                                                    | 38.3%        | 30.7%         |
| Percent intronic bases                                               | 3.9%         | 5.6%          |
| Percent intergenic bases                                             | 2.7%         | 3.0%          |
| Percent ribosomal bases                                              | 1.7%         | 4.2%          |
| Number of genes detected (FPKM >1)                                   | 12,846       | 13,281        |
| Percentage of all Ensembl exon-exon junctions detected               | 54.4%        | 55.8%         |
| Percentage of detected exon-exon junctions that are known to Ensembl | 90.1%        | 91.5%         |
| Percentage of reads consumed by the top 1% of expressed genes        | 49.4%        | 34.7%         |
