# Supplementary material for: Genome Modeling System: A Knowledge Management Platform for Genomics
Source: PubMed Central journal article supplement (PMC4497734; doi:10.1371/journal.pcbi.1004274), 2015-07-09
Supplement: pcbi.1004274.s019.pdf [file pcbi.1004274.s019.pdf]

**S4 Table. HCC1395/BL selected candidate cancer associated SNVs**

| <b>Gene</b>   | <b>Amino Acid Change</b> | <b>WGS Tumor VAF</b> | <b>Exome Tumor VAF</b> | <b>RNA-seq Tumor VAF</b> | <b>RNA-seq Tumor gene FPKM</b> | <b>Mutant Expression Class</b> |
|---------------|--------------------------|----------------------|------------------------|--------------------------|--------------------------------|--------------------------------|
| <i>TP53</i>   | R175H                    | 100.00               | 98.86                  | 99.94                    | 153.62                         | Expressed                      |
| <i>PDGFRB</i> | T882I                    | 28.33                | 29.13                  | 100.00                   | 0.06                           | Silent Gene                    |
| <i>FGFR1</i>  | S158L                    | 100.00               | 100.00                 | 100.00                   | 51.12                          | Expressed                      |
| <i>CREBBP</i> | H1297Q                   | 29.69                | 23.53                  | 31.64                    | 20.98                          | Expressed                      |
| <i>BRCA2</i>  | E1593*                   | 45.26                | 42.59                  | 48.39                    | 2.02                           | Expressed                      |
| <i>ABL2</i>   | T753A                    | 31.58                | 35.48                  | 33.33                    | 5.62                           | Expressed                      |
| <i>MLL</i>    | C151F                    | 9.30                 | 7.46                   | 0.00                     | 5.71                           | Unknown                        |
| <i>MSH6</i>   | D1255N                   | 32.47                | 31.82                  | 30.53                    | 19.47                          | Expressed                      |
| <i>EPHA8</i>  | N123K                    | 36.36                | 26.72                  | 0.00                     | 0.00                           | Silent Gene                    |
| <i>EPHA10</i> | L709M                    | 33.33                | 38.22                  | 0.00                     | 0.01                           | Silent Gene                    |
| <i>EPHB1</i>  | E245*                    | 9.38                 | 5.94                   | 0.00                     | 0.04                           | Silent Gene                    |
| <i>PLCG1</i>  | S582C                    | 40.82                | 42.86                  | 53.49                    | 9.69                           | Expressed                      |
| <i>CASC5</i>  | P865S                    | 49.15                | 46.15                  | 50.00                    | 3.10                           | Expressed                      |
| <i>STAT1</i>  | P493A                    | 48.81                | 58.10                  | 53.71                    | 46.85                          | Expressed                      |
| <i>TRPM7</i>  | K153T                    | 47.37                | 50.00                  | 44.95                    | 3.45                           | Expressed                      |
| <i>CFTR</i>   | G437C                    | 13.30                | 10.94                  | 0.00                     | 0.00                           | Silent Gene                    |
| <i>PRKX</i>   | V43A                     | 100.00               | 100.00                 | 100.00                   | 18.92                          | Expressed                      |
| <i>FLNA</i>   | D2581H                   | 100.00               | 99.17                  | 99.81                    | 294.41                         | Expressed                      |
| <i>SGK3</i>   | A92V                     | 42.62                | 22.86                  | 27.27                    | 0.44                           | Expressed                      |
