# Supplementary material for: Genome Modeling System: A Knowledge Management Platform for Genomics
Source: PubMed Central journal article supplement (PMC4497734; doi:10.1371/journal.pcbi.1004274), 2015-07-09
Supplement: pcbi.1004274.s020.pdf [file pcbi.1004274.s020.pdf]

**S5 Table. Test hardware configurations**

| <b>System</b>            | <b>Hardware Specification</b>                                                | <b>Cost</b>               | <b>Operating System</b>                                           | <b>Comments</b>                                                                                                   |
|--------------------------|------------------------------------------------------------------------------|---------------------------|-------------------------------------------------------------------|-------------------------------------------------------------------------------------------------------------------|
| MacBook Pro              | 4 CPUs, 16 Gb RAM, 750 Gb solid state storage                                | \$3,000                   | OS X 10.9.2 with Ubuntu 12.04 installed via Vagrant + virtualbox) | Used to test installation                                                                                         |
| Dell Precision T7600     | 8 CPUs, 64 Gb RAM, 5 Tb SATA storage                                         | \$4,000                   | Ubuntu 12.04 Precise                                              | Used to test installation, for network isolation testing and to run analysis with down-sampled data               |
| MacPro Desktop           | 8 CPUs, 64Gb RAM, 7 Tb SATA storage                                          | \$6,000                   | OS X 10.9.2 with Ubuntu 12.04 installed via Vagrant + virtualbox) | Used to test multiple concurrent installations and run analysis with down-sampled data                            |
| Dell data center blade   | 24 CPUs, 128 Gb RAM, 2Tb+ (SATA + network disk)                              | \$20,000                  | Ubuntu 12.04 Precise                                              | Used for analysis of full HCC1395 WGS, exome and RNA-seq data                                                     |
| Dell Power Edge R910 4U  | 80 CPUs, 1 Tb RAM, 2.4 Tb Fusion IO storage                                  | \$53,000                  | Ubuntu 12.04 Precise                                              | Used for analysis of full HCC1395 WGS, exome and RNA-seq data. Multiple samples and pipelines run concurrently    |
| Amazon AWS EC2 Instances | i2.2xlarge, c3.8xlarge, r3.8xlarge, i2.4xlarge, i2.8xlarge, and hs1.8xlarge. | \$1.68 to \$6.82 per hour | Ubuntu 12.04 Precise (search for AMI: 'SGMS_INSTALL')             | Used for various tests of HCC1395 data and other public data. Instance type can be tailored to the amount of data |

All costs are approximate. For complete details of Amazon AWS EC2 instance type hardware specifications and costs please refer to: <http://aws.amazon.com/ec2/pricing/>
