# Supplementary material for: Genome Modeling System: A Knowledge Management Platform for Genomics
Source: PubMed Central journal article supplement (PMC4497734; doi:10.1371/journal.pcbi.1004274), 2015-07-09
Supplement: pcbi.1004274.s021.pdf [file pcbi.1004274.s021.pdf]

**S6 Table. The GMS, conceptually related resources, and their features**

| <b>Name</b>                  | <b>Published</b> | <b>Source Code</b> | <b>Commercial</b> | <b>Open Source</b> | <b>Analysis Tracking</b> | <b>Pipelines</b> |
|------------------------------|------------------|--------------------|-------------------|--------------------|--------------------------|------------------|
| Genome Modeling System       | Pending          | Yes                | No                | Yes                | Yes                      | G, S, R, D, C    |
| Galaxy                       | Yes              | Yes                | No                | Yes                | Yes                      | G, S, R, D       |
| bcbio-nextgen                | No               | Yes                | No                | Yes                | No                       | G, S, R, D, C    |
| Illumina BaseSpace           | No               | No                 | Yes               | No                 | Yes                      | G, S, R, D, C    |
| SeqWare                      | Yes              | Yes                | No                | Yes                | Yes                      | None             |
| DNA Nexus Platform           | No               | Yes                | Yes               | Partial            | Yes                      | G, S, R, C       |
| gkno                         | No               | Yes                | No                | Yes                | No                       | G                |
| GATK's Queue                 | No               | Yes                | Both              | Partial            | No                       | G, S, C          |
| Appistry's Ayrris            | No               | No                 | Yes               | No                 | No                       | G, S, C          |
| Curoverse's Arvados          | No               | Yes                | Both              | Yes                | Yes                      | G                |
| CGA's Firehose               | No               | No                 | No                | No                 | Yes                      | S, R,            |
| Seven Bridges Genomics       | No               | No                 | Yes               | No                 | Yes                      | G, R, D          |
| ga4gh                        | No               | Yes                | Both              | Yes                | N/A                      | None             |
| IBM's PowerGene Orchestrator | No               | No                 | Yes               | No                 | N/A                      | None             |
| MIT STAR                     | Yes              | Yes                | No                | Yes                | No                       | None             |

Abbreviations: G = Germline, S = Somatic variation, R = RNA-seq expression, D = Differential expression, C = Clinical interpretation

For a more detailed and up to date version of this table maintained online, please refer to:

<https://github.com/genome/gms/wiki/The-GMS-compared-to-conceptually-related-resources>
